# Supplementary material for: Repurposing the anticancer drug cisplatin with the aim of developing novel Pseudomonas aeruginosa infection control agents
Source: PubMed Central journal article supplement (PMC6296412; doi:10.3762/bjoc.14.284), 2018-12-14
Supplement: Beilstein_J_Org_Chem-14-3059-s001.pdf [file Beilstein_J_Org_Chem-14-3059-s001.pdf]

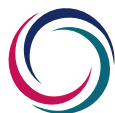

## Supporting Information

for

### Repurposing the anticancer drug cisplatin with the aim of developing novel *Pseudomonas aeruginosa* infection control agents

Mingjun Yuan, Song Lin Chua, Yang Liu, Daniela I. Drautz-Moses,  
Joey Kuok Hoong Yam, Thet Tun Aung, Roger W. Beuerman,  
May Margarete Santillan Salido, Stephan C. Schuster, Choon-Hong Tan,  
Michael Givskov, Liang Yang and Thomas E. Nielsen

*Beilstein J. Org. Chem.* **2018**, *14*, 3059–3069. doi:10.3762/bjoc.14.284

## Additional information

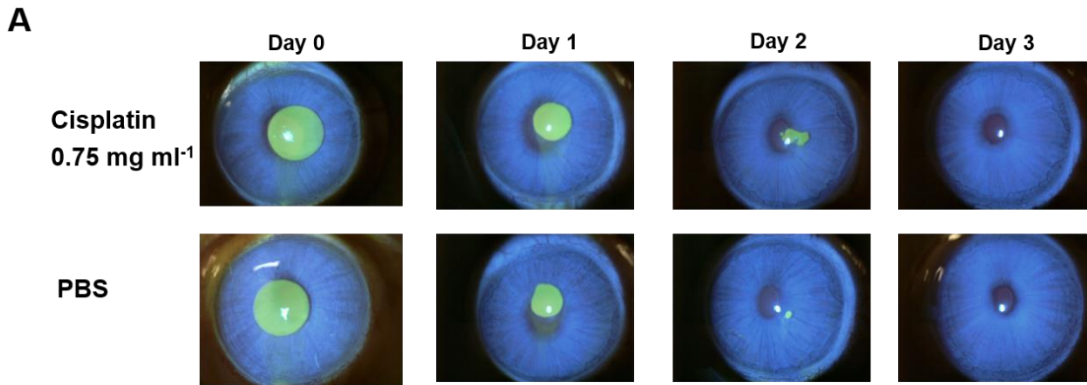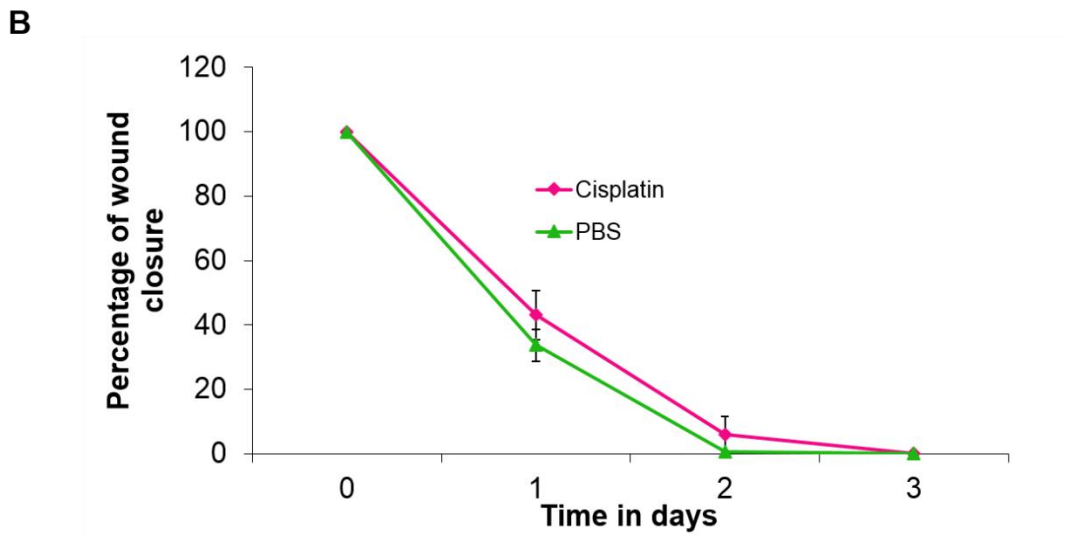

**Figure S1: Rabbit corneal wound healing model.** (a) Recovery and closure of wound with cisplatin treatment. (b) Percentage of wound closure on the scratched cornea.

**Table S1: Genes induced at least 2 folds in PAO1 by cisplatin treatment.**

| Locus_Tag | fold change | P-Value | Gene name | Annotation                                                                                                                      |
|-----------|-------------|---------|-----------|---------------------------------------------------------------------------------------------------------------------------------|
| PA0045    | 2.0         | 0.0011  | PA0045    | Hypothetical, unclassified, unknown                                                                                             |
| PA0046    | 3.1         | 0.0001  | PA0046    | Hypothetical, unclassified, unknown                                                                                             |
| PA0069    | 21.8        | 0.0000  | PA0069    | Hypothetical, unclassified, unknown                                                                                             |
| PA0070    | 2.1         | 0.0000  | PA0070    | Membrane proteins; Protein secretion/export apparatus                                                                           |
| PA0083    | 2.3         | 0.0000  | PA0083    | Protein secretion/export apparatus                                                                                              |
| PA0084    | 2.4         | 0.0000  | PA0084    | Protein secretion/export apparatus                                                                                              |
| PA0085    | 3.2         | 0.0000  | hcp1      | Secreted Factors (toxins, enzymes, alginate)                                                                                    |
| PA0086    | 2.5         | 0.0000  | PA0086    | Protein secretion/export apparatus                                                                                              |
| PA0087    | 2.6         | 0.0020  | PA0087    | Protein secretion/export apparatus                                                                                              |
| PA0088    | 2.1         | 0.0000  | PA0088    | Protein secretion/export apparatus                                                                                              |
| PA0089    | 2.3         | 0.0000  | PA0089    | Protein secretion/export apparatus                                                                                              |
| PA0090    | 2.4         | 0.0000  | clpV1     | Translation, post-translational modification, degradation; Chaperones & heat shock proteins; Protein secretion/export apparatus |
| PA0091    | 2.0         | 0.0000  | vgrG1     | Protein secretion/export apparatus                                                                                              |
| PA0126    | 2.9         | 0.0000  | PA0126    | Hypothetical, unclassified, unknown                                                                                             |
| PA0151    | 2.4         | 0.0000  | PA0151    | Transport of small molecules                                                                                                    |
| PA0277    | 3.6         | 0.0000  | PA0277    | Hypothetical, unclassified, unknown                                                                                             |
| PA0320    | 3.6         | 0.0000  | PA0320    | Hypothetical, unclassified, unknown                                                                                             |
| PA0514    | 18.4        | 0.0441  | nirL      | Hypothetical, unclassified, unknown; Energy metabolism; Biosynthesis of cofactors, prosthetic groups and carriers               |
| PA0516    | 2.4         | 0.0129  | nirF      | Energy metabolism; Biosynthesis of cofactors, prosthetic groups and carriers                                                    |
| PA0528    | 2.7         | 0.0001  | PA0528    | Transcriptional regulators                                                                                                      |
| PA0578    | 2.2         | 0.0000  | PA0578    | Hypothetical, unclassified, unknown                                                                                             |
| PA0608    | 2.9         | 0.0000  | PA0608    | Carbon compound catabolism                                                                                                      |
| PA0610    | 34.0        | 0.0000  | prtN      | Transcriptional regulators                                                                                                      |
| PA0611    | 4.5         | 0.0000  | prtR      | Transcriptional regulators                                                                                                      |
| PA0612    | 31.3        | 0.0000  | ptrB      | Transcriptional regulators                                                                                                      |
| PA0613    | 41.5        | 0.0000  | PA0613    | Hypothetical, unclassified, unknown                                                                                             |
| PA0614    | 63.6        | 0.0000  | PA0614    | Hypothetical, unclassified, unknown                                                                                             |
| PA0615    | 42.3        | 0.0000  | PA0615    | Hypothetical, unclassified, unknown                                                                                             |
| PA0616    | 66.3        | 0.0000  | PA0616    | Related to phage, transposon, or plasmid                                                                                        |
| PA0617    | 61.7        | 0.0000  | PA0617    | Related to phage, transposon, or plasmid                                                                                        |
| PA0618    | 67.4        | 0.0000  | PA0618    | Related to phage, transposon, or plasmid                                                                                        |
| PA0619    | 72.7        | 0.0000  | PA0619    | Related to phage, transposon, or plasmid                                                                                        |
| PA0620    | 51.7        | 0.0000  | PA0620    | Related to phage, transposon, or plasmid                                                                                        |
| PA0621    | 43.7        | 0.0000  | PA0621    | Related to phage, transposon, or plasmid                                                                                        |
| PA0622    | 64.5        | 0.0000  | PA0622    | Related to phage, transposon, or plasmid                                                                                        |
| PA0623    | 67.0        | 0.0000  | PA0623    | Related to phage, transposon, or plasmid                                                                                        |
| PA0624    | 66.1        | 0.0000  | PA0624    | Related to phage, transposon, or plasmid                                                                                        |
| PA0625    | 57.4        | 0.0000  | PA0625    | Related to phage, transposon, or plasmid                                                                                        |

|        |       |        |        |                                                                           |
|--------|-------|--------|--------|---------------------------------------------------------------------------|
| PA0626 | 52.9  | 0.0000 | PA0626 | Related to phage, transposon, or plasmid                                  |
| PA0627 | 46.3  | 0.0000 | PA0627 | Related to phage, transposon, or plasmid                                  |
| PA0628 | 62.7  | 0.0000 | PA0628 | Related to phage, transposon, or plasmid                                  |
| PA0629 | 60.5  | 0.0000 | PA0629 | Related to phage, transposon, or plasmid                                  |
| PA0630 | 32.7  | 0.0000 | PA0630 | Related to phage, transposon, or plasmid                                  |
| PA0631 | 46.4  | 0.0000 | PA0631 | Related to phage, transposon, or plasmid                                  |
| PA0632 | 56.6  | 0.0000 | PA0632 | Related to phage, transposon, or plasmid                                  |
| PA0633 | 67.8  | 0.0000 | PA0633 | Related to phage, transposon, or plasmid                                  |
| PA0634 | 66.2  | 0.0000 | PA0634 | Related to phage, transposon, or plasmid                                  |
| PA0635 | 61.1  | 0.0000 | PA0635 | Related to phage, transposon, or plasmid                                  |
| PA0636 | 68.8  | 0.0000 | PA0636 | Related to phage, transposon, or plasmid                                  |
| PA0637 | 75.6  | 0.0000 | PA0637 | Related to phage, transposon, or plasmid                                  |
| PA0638 | 71.3  | 0.0000 | PA0638 | Related to phage, transposon, or plasmid                                  |
| PA0640 | 68.4  | 0.0000 | PA0640 | Related to phage, transposon, or plasmid                                  |
| PA0641 | 65.8  | 0.0000 | PA0641 | Related to phage, transposon, or plasmid                                  |
| PA0642 | 100.6 | 0.0000 | PA0642 | Related to phage, transposon, or plasmid                                  |
| PA0643 | 53.8  | 0.0000 | PA0643 | Related to phage, transposon, or plasmid                                  |
| PA0644 | 31.7  | 0.0000 | PA0644 | Related to phage, transposon, or plasmid                                  |
| PA0645 | 39.4  | 0.0000 | PA0645 | Related to phage, transposon, or plasmid                                  |
| PA0646 | 35.2  | 0.0000 | PA0646 | Related to phage, transposon, or plasmid                                  |
| PA0647 | 28.1  | 0.0000 | PA0647 | Related to phage, transposon, or plasmid                                  |
| PA0648 | 28.3  | 0.0000 | PA0648 | Related to phage, transposon, or plasmid                                  |
| PA0649 | 2.4   | 0.0000 | trpG   | anthranilate synthase component II                                        |
| PA0654 | 2.7   | 0.0000 | speD   | S-adenosylmethionine decarboxylase proenzyme                              |
| PA0669 | 5.7   | 0.0000 | dnaE2  | Putative enzymes; DNA replication, recombination, modification and repair |
| PA0670 | 9.2   | 0.0000 | imuB   | DNA polymerase-like protein PA0670                                        |
| PA0671 | 18.4  | 0.0000 | imuA   | Predicted RecA/RadA recombinase                                           |
| PA0729 | 2.2   | 0.0000 | PA0729 | Hypothetical, unclassified, unknown                                       |
| PA0730 | 2.9   | 0.0000 | PA0730 | Putative enzymes                                                          |
| PA0731 | 2.6   | 0.0000 | PA0731 | Hypothetical, unclassified, unknown                                       |
| PA0733 | 2.3   | 0.0000 | PA0733 | Transcription, RNA processing and degradation                             |
| PA0780 | 2.3   | 0.0000 | pruR   | proline utilization regulator                                             |
| PA0781 | 33.8  | 0.0000 | PA0781 | Hypothetical, unclassified, unknown                                       |
| PA0805 | 2.6   | 0.0000 | PA0805 | Hypothetical, unclassified, unknown                                       |
| PA0807 | 39.8  | 0.0000 | ampDh3 | Antibiotic resistance and susceptibility                                  |
| PA0808 | 9.6   | 0.0000 | PA0808 | Hypothetical, unclassified, unknown                                       |
| PA0809 | 14.7  | 0.0000 | PA0809 | Membrane proteins; Transport of small molecules                           |
| PA0810 | 6.9   | 0.0000 | PA0810 | Carbon compound catabolism                                                |
| PA0811 | 14.5  | 0.0000 | PA0811 | Membrane proteins; Transport of small molecules                           |
| PA0812 | 20.7  | 0.0000 | PA0812 | Hypothetical, unclassified, unknown                                       |
| PA0813 | 9.5   | 0.0000 | PA0813 | Hypothetical, unclassified, unknown                                       |
| PA0814 | 9.8   | 0.0000 | PA0814 | Hypothetical, unclassified, unknown                                       |

|        |      |        |        |                                                                                 |
|--------|------|--------|--------|---------------------------------------------------------------------------------|
| PA0815 | 2.7  | 0.0000 | PA0815 | Transcriptional regulators                                                      |
| PA0816 | 6.3  | 0.0000 | PA0816 | Transcriptional regulators                                                      |
| PA0817 | 8.9  | 0.0000 | PA0817 | Putative enzymes                                                                |
| PA0818 | 3.8  | 0.0000 | PA0818 | Hypothetical, unclassified, unknown                                             |
| PA0819 | 10.2 | 0.0000 | PA0819 | Hypothetical, unclassified, unknown                                             |
| PA0821 | 2.3  | 0.0000 | PA0821 | Hypothetical, unclassified, unknown                                             |
| PA0822 | 2.8  | 0.0000 | PA0822 | Hypothetical, unclassified, unknown                                             |
| PA0823 | 3.5  | 0.0000 | PA0823 | Hypothetical, unclassified, unknown                                             |
| PA0824 | 6.4  | 0.0000 | PA0824 | Hypothetical, unclassified, unknown                                             |
| PA0825 | 11.8 | 0.0000 | PA0825 | Hypothetical, unclassified, unknown                                             |
| PA0826 | 4.7  | 0.0000 | PA0826 | Hypothetical, unclassified, unknown                                             |
| PA0827 | 3.4  | 0.0000 | PA0827 | Hypothetical, unclassified, unknown                                             |
| PA0828 | 4.2  | 0.0000 | PA0828 | Transcriptional regulators                                                      |
| PA0829 | 6.3  | 0.0000 | PA0829 | Putative enzymes                                                                |
| PA0830 | 3.6  | 0.0000 | PA0830 | Hypothetical, unclassified, unknown                                             |
| PA0831 | 2.3  | 0.0000 | oruR   | transcriptional regulator OruR                                                  |
| PA0834 | 4.6  | 0.0000 | PA0834 | Hypothetical, unclassified, unknown                                             |
| PA0839 | 2.6  | 0.0007 | PA0839 | Transcriptional regulators                                                      |
| PA0840 | 2.4  | 0.0000 | PA0840 | Putative enzymes                                                                |
| PA0842 | 3.5  | 0.0000 | PA0842 | Putative enzymes                                                                |
| PA0844 | 3.1  | 0.0000 | plcH   | Secreted Factors (toxins, enzymes, alginate)                                    |
| PA0845 | 3.3  | 0.0000 | PA0845 | Hypothetical, unclassified, unknown                                             |
| PA0848 | 2.0  | 0.0024 | PA0848 | Adaptation, Protection; Putative enzymes                                        |
| PA0865 | 3.9  | 0.0000 | hpd    | 4-hydroxyphenylpyruvate dioxygenase                                             |
| PA0872 | 2.2  | 0.0000 | phhA   | phenylalanine-4-hydroxylase                                                     |
| PA0906 | 4.6  | 0.0000 | PA0906 | Transcriptional regulators                                                      |
| PA0907 | 15.0 | 0.0000 | PA0907 | Hypothetical, unclassified, unknown                                             |
| PA0908 | 31.7 | 0.0000 | PA0908 | Hypothetical, unclassified, unknown                                             |
| PA0909 | 23.9 | 0.0000 | PA0909 | Related to phage, transposon, or plasmid; Membrane proteins                     |
| PA0910 | 34.5 | 0.0000 | PA0910 | Hypothetical, unclassified, unknown                                             |
| PA0911 | 32.6 | 0.0000 | PA0911 | Hypothetical, unclassified, unknown                                             |
| PA0912 | 19.4 | 0.0000 | PA0912 | Hypothetical, unclassified, unknown                                             |
| PA0913 | 3.0  | 0.0000 | mgtE   | Transport of small molecules                                                    |
| PA0914 | 6.3  | 0.0000 | PA0914 | Hypothetical, unclassified, unknown                                             |
| PA0915 | 8.4  | 0.0000 | PA0915 | Hypothetical, unclassified, unknown                                             |
| PA0916 | 2.9  | 0.0000 | PA0916 | Hypothetical, unclassified, unknown                                             |
| PA0918 | 5.2  | 0.0000 | PA0918 | cytochrome b561                                                                 |
| PA0922 | 12.4 | 0.0000 | PA0922 | Hypothetical, unclassified, unknown                                             |
| PA0923 | 3.1  | 0.0000 | dinB   | Adaptation, Protection; DNA replication, recombination, modification and repair |
| PA0924 | 2.6  | 0.0000 | PA0924 | Hypothetical, unclassified, unknown; Membrane proteins                          |
| PA0939 | 2.0  | 0.0106 | PA0939 | Hypothetical, unclassified, unknown                                             |
| PA0977 | 3.9  | 0.0000 | PA0977 | Hypothetical, unclassified, unknown                                             |

|        |      |        |        |                                                                               |
|--------|------|--------|--------|-------------------------------------------------------------------------------|
| PA0978 | 3.1  | 0.0000 | PA0978 | Related to phage, transposon, or plasmid                                      |
| PA0985 | 16.2 | 0.0000 | pyoS5  | Membrane proteins; Secreted Factors (toxins, enzymes, alginate)               |
| PA1044 | 2.4  | 0.0001 | PA1044 | Membrane proteins                                                             |
| PA1045 | 2.6  | 0.0000 | dinG   | ATP-dependent helicase DinG/Rad3                                              |
| PA1077 | 2.4  | 0.0000 | flgB   | flagellar basal-body rod protein FlgB                                         |
| PA1078 | 2.1  | 0.0000 | flgC   | flagellar basal-body rod protein FlgC                                         |
| PA1081 | 2.1  | 0.0000 | flgF   | flagellar basal-body rod protein FlgF                                         |
| PA1092 | 2.0  | 0.0000 | fliC   | flagellin type B                                                              |
| PA1096 | 2.1  | 0.0000 | PA1096 | Hypothetical, unclassified, unknown                                           |
| PA1100 | 2.4  | 0.0000 | fliE   | flagellar hook-basal body complex protein FliE                                |
| PA1150 | 18.6 | 0.0000 | pys2   | pyocin S2                                                                     |
| PA1151 | 7.6  | 0.0000 | imm2   | pyocin S2 immunity protein                                                    |
| PA1152 | 9.4  | 0.0000 | PA1152 | Hypothetical, unclassified, unknown                                           |
| PA1153 | 2.7  | 0.0321 | PA1153 | Hypothetical, unclassified, unknown                                           |
| PA1178 | 2.2  | 0.0000 | oprH   | PhoP/Q and low Mg <sup>2+</sup> inducible outer membrane protein H1 precursor |
| PA1326 | 2.1  | 0.0308 | ilvA2  | "threonine dehydratase, biosynthetic"                                         |
| PA1331 | 2.4  | 0.0001 | PA1331 | Hypothetical, unclassified, unknown                                           |
| PA1435 | 3.0  | 0.0000 | PA1435 | Transport of small molecules                                                  |
| PA1466 | 7.9  | 0.0000 | PA1466 | Hypothetical, unclassified, unknown                                           |
| PA1546 | 3.0  | 0.0000 | hemN   | oxygen-independent coproporphyrinogen III oxidase                             |
| PA1547 | 4.5  | 0.0000 | PA1547 | Membrane proteins                                                             |
| PA1548 | 2.7  | 0.0000 | PA1548 | Hypothetical, unclassified, unknown                                           |
| PA1549 | 4.8  | 0.0000 | PA1549 | Membrane proteins; Transport of small molecules                               |
| PA1550 | 2.0  | 0.0014 | PA1550 | Hypothetical, unclassified, unknown                                           |
| PA1551 | 2.1  | 0.0000 | PA1551 | Energy metabolism                                                             |
| PA1591 | 2.1  | 0.0277 | PA1591 | Membrane proteins                                                             |
| PA1596 | 2.3  | 0.0000 | htpG   | heat shock protein HtpG                                                       |
| PA1608 | 2.4  | 0.0000 | PA1608 | Adaptation, Protection; Chemotaxis                                            |
| PA1679 | 2.3  | 0.0000 | PA1679 | Hypothetical, unclassified, unknown                                           |
| PA1791 | 2.0  | 0.0004 | PA1791 | Hypothetical, unclassified, unknown                                           |
| PA1797 | 2.3  | 0.0000 | PA1797 | Hypothetical, unclassified, unknown                                           |
| PA1798 | 2.2  | 0.0000 | parS   | Two-component regulatory systems; Antibiotic resistance and susceptibility    |
| PA1845 | 3.9  | 0.0003 | PA1845 | Hypothetical, unclassified, unknown                                           |
| PA1854 | 2.2  | 0.0001 | PA1854 | Hypothetical, unclassified, unknown                                           |
| PA1865 | 4.7  | 0.0000 | PA1865 | Hypothetical protein, restriction endonuclease-like VRR-NUC domain            |
| PA1866 | 2.0  | 0.0000 | PA1866 | Rad3-related DNA helicases                                                    |
| PA1892 | 3.1  | 0.0000 | PA1892 | Hypothetical, unclassified, unknown                                           |
| PA1921 | 2.0  | 0.0034 | PA1921 | Hypothetical, unclassified, unknown                                           |
| PA1922 | 10.9 | 0.0000 | PA1922 | Transport of small molecules                                                  |
| PA1923 | 6.2  | 0.0000 | PA1923 | Biosynthesis of cofactors, prosthetic groups and carriers                     |
| PA1924 | 3.4  | 0.0357 | PA1924 | Hypothetical, unclassified, unknown                                           |

|        |      |        |        |                                                                                                   |
|--------|------|--------|--------|---------------------------------------------------------------------------------------------------|
| PA1925 | 4.0  | 0.0000 | PA1925 | Hypothetical, unclassified, unknown                                                               |
| PA1959 | 3.5  | 0.0000 | bacA   | bacitracin resistance protein                                                                     |
| PA1967 | 2.0  | 0.0032 | PA1967 | Hypothetical, unclassified, unknown                                                               |
| PA1999 | 3.4  | 0.0000 | dhcA   | Amino acid biosynthesis and metabolism; Carbon compound catabolism                                |
| PA2000 | 3.0  | 0.0000 | dhcB   | Amino acid biosynthesis and metabolism; Carbon compound catabolism                                |
| PA2009 | 2.3  | 0.0000 | hmgA   | "homogentisate 1,2-dioxygenase"                                                                   |
| PA2012 | 3.0  | 0.0000 | liuD   | Carbon compound catabolism                                                                        |
| PA2013 | 4.9  | 0.0000 | liuC   | Carbon compound catabolism                                                                        |
| PA2014 | 4.6  | 0.0000 | liuB   | Carbon compound catabolism                                                                        |
| PA2015 | 7.2  | 0.0000 | liuA   | Carbon compound catabolism                                                                        |
| PA2016 | 5.4  | 0.0000 | liuR   | Transcriptional regulators                                                                        |
| PA2036 | 2.7  | 0.0395 | PA2036 | Hypothetical, unclassified, unknown                                                               |
| PA2258 | 2.0  | 0.0046 | ptxR   | transcriptional regulator PtxR                                                                    |
| PA2278 | 2.5  | 0.0007 | arsB   | ArsB protein                                                                                      |
| PA2282 | 5.3  | 0.0000 | PA2282 | Hypothetical, unclassified, unknown                                                               |
| PA2283 | 8.9  | 0.0000 | PA2283 | Hypothetical, unclassified, unknown                                                               |
| PA2284 | 6.4  | 0.0000 | PA2284 | Hypothetical, unclassified, unknown                                                               |
| PA2285 | 11.5 | 0.0000 | PA2285 | Hypothetical, unclassified, unknown                                                               |
| PA2286 | 19.5 | 0.0000 | PA2286 | Membrane proteins                                                                                 |
| PA2287 | 24.2 | 0.0000 | PA2287 | Hypothetical, unclassified, unknown                                                               |
| PA2288 | 35.0 | 0.0000 | PA2288 | Hypothetical, unclassified, unknown                                                               |
| PA2428 | 2.8  | 0.0000 | PA2428 | Hypothetical, unclassified, unknown                                                               |
| PA2439 | 2.2  | 0.0089 | PA2439 | Membrane proteins                                                                                 |
| PA2493 | 2.2  | 0.0003 | mexE   | Resistance-Nodulation-Cell Division (RND) multidrug efflux membrane fusion protein MexE precursor |
| PA2554 | 2.5  | 0.0000 | PA2554 | Putative enzymes                                                                                  |
| PA2555 | 2.9  | 0.0000 | PA2555 | Putative enzymes                                                                                  |
| PA2557 | 2.6  | 0.0000 | PA2557 | Fatty acid and phospholipid metabolism                                                            |
| PA2560 | 2.5  | 0.0000 | PA2560 | Hypothetical, unclassified, unknown                                                               |
| PA2654 | 2.3  | 0.0000 | PA2654 | Adaptation, Protection; Chemotaxis                                                                |
| PA2767 | 2.2  | 0.0003 | PA2767 | Putative enzymes                                                                                  |
| PA2768 | 2.9  | 0.0008 | PA2768 | Membrane proteins                                                                                 |
| PA2840 | 7.2  | 0.0000 | PA2840 | Transcription, RNA processing and degradation                                                     |
| PA2926 | 2.8  | 0.0209 | hisP   | histidine transport protein HisP                                                                  |
| PA2970 | 2.0  | 0.0000 | rpmF   | 50S ribosomal protein L32                                                                         |
| PA2971 | 2.3  | 0.0000 | PA2971 | Hypothetical, unclassified, unknown                                                               |
| PA3007 | 13.8 | 0.0000 | lexA   | repressor protein LexA                                                                            |
| PA3008 | 12.9 | 0.0000 | PA3008 | Hypothetical, unclassified, unknown                                                               |
| PA3009 | 2.4  | 0.0000 | PA3009 | Hypothetical, unclassified, unknown                                                               |
| PA3126 | 2.4  | 0.0000 | ibpA   | heat-shock protein IbpA                                                                           |
| PA3174 | 3.1  | 0.0000 | PA3174 | Transcriptional regulators                                                                        |
| PA3175 | 2.1  | 0.0126 | PA3175 | Amino acid biosynthesis and metabolism                                                            |

|          |      |        |          |                                                           |
|----------|------|--------|----------|-----------------------------------------------------------|
| PA3176   | 2.2  | 0.0175 | gltS     | sodium/glutamate symporter GltS                           |
| PA3268   | 2.2  | 0.0000 | PA3268   | Membrane proteins; Transport of small molecules           |
| PA3391   | 2.2  | 0.0020 | nosR     | regulatory protein NosR                                   |
| PA3392   | 2.4  | 0.0000 | nosZ     | nitrous-oxide reductase precursor                         |
| PA3393   | 2.0  | 0.0216 | nosD     | NosD protein                                              |
| PA3395   | 4.2  | 0.0000 | nosY     | NosY protein                                              |
| PA3396   | 2.9  | 0.0165 | nosL     | NosL protein                                              |
| PA3413   | 4.5  | 0.0000 | yebG     | SOS regulon DNA damage-inducible protein                  |
| PA3414   | 3.0  | 0.0000 | PA3414   | Hypothetical, unclassified, unknown                       |
| PA3526   | 2.2  | 0.0000 | PA3526   | Membrane proteins                                         |
| PA3532   | 2.4  | 0.0087 | PA3532   | Membrane proteins                                         |
| PA3597   | 2.1  | 0.0002 | PA3597   | Membrane proteins; Transport of small molecules           |
| PA3598   | 3.4  | 0.0000 | PA3598   | Hypothetical, unclassified, unknown                       |
| PA3599   | 14.8 | 0.0000 | PA3599   | Transcriptional regulators                                |
| PA3600   | 45.0 | 0.0000 | PA3600   | Translation, post-translational modification, degradation |
| PA3601   | 60.9 | 0.0000 | PA3601   | Translation, post-translational modification, degradation |
| PA3610   | 2.1  | 0.0216 | potD     | polyamine transport protein PotD                          |
| PA3616   | 6.2  | 0.0000 | recX     | Regulatory protein RecX                                   |
| PA3617   | 11.3 | 0.0000 | recA     | RecA protein                                              |
| PA3661   | 4.0  | 0.0000 | PA3661   | Hypothetical, unclassified, unknown                       |
| PA3677   | 2.1  | 0.0160 | PA3677   | Transport of small molecules                              |
| PA3727   | 6.3  | 0.0000 | PA3727   | Hypothetical, unclassified, unknown                       |
| PA3728   | 5.4  | 0.0000 | PA3728   | Hypothetical, unclassified, unknown                       |
| PA3729   | 6.8  | 0.0000 | PA3729   | Hypothetical, unclassified, unknown                       |
| PA3730   | 7.3  | 0.0000 | PA3730   | Membrane proteins                                         |
| PA3731   | 6.2  | 0.0000 | PA3731   | Hypothetical, unclassified, unknown                       |
| PA3732   | 7.3  | 0.0000 | PA3732   | Hypothetical, unclassified, unknown                       |
| PA3741   | 2.0  | 0.0025 | PA3741   | Hypothetical, unclassified, unknown                       |
| PA3742   | 3.8  | 0.0000 | rplS     | 50S ribosomal protein L19                                 |
| PA3743   | 2.9  | 0.0000 | trmD     | tRNA (guanine-N1)-methyltransferase                       |
| PA3761   | 2.9  | 0.0000 | PA3761   | Transport of small molecules                              |
| PA3865.1 | 6.6  | 0.0000 | PA3865.1 | pyocin S4 immunity protein                                |
| PA3866   | 6.4  | 0.0000 | PA3866   | pyocin protein                                            |
| PA3901   | 2.0  | 0.0000 | fecA     | Fe(III) dicitrate transport protein FecA                  |
| PA3967   | 2.2  | 0.0148 | PA3967   | Hypothetical, unclassified, unknown                       |
| PA3979   | 2.7  | 0.0000 | PA3979   | Hypothetical, unclassified, unknown                       |
| PA3990   | 3.6  | 0.0002 | PA3990   | Hypothetical, unclassified, unknown                       |
| PA4063   | 27.8 | 0.0000 | PA4063   | Hypothetical, unclassified, unknown                       |
| PA4064   | 8.4  | 0.0000 | PA4064   | Transport of small molecules                              |
| PA4065   | 9.5  | 0.0000 | PA4065   | Membrane proteins                                         |
| PA4066   | 5.0  | 0.0000 | PA4066   | Hypothetical, unclassified, unknown                       |
| PA4153   | 2.0  | 0.0302 | PA4153   | "2,3-butanediol dehydrogenase"                            |
| PA4154   | 2.2  | 0.0008 | PA4154   | Hypothetical, unclassified, unknown                       |



|          |      |        |          |                                                        |
|----------|------|--------|----------|--------------------------------------------------------|
| PA4272   | 2.0  | 0.0000 | rplJ     | 50S ribosomal protein L10                              |
| PA4272.1 | 2.1  | 0.0000 | PA4272.1 | Non-coding RNA gene                                    |
| PA4326   | 2.0  | 0.0007 | PA4326   | Hypothetical, unclassified, unknown                    |
| PA4385   | 2.2  | 0.0000 | groEL    | GroEL protein                                          |
| PA4386   | 2.1  | 0.0000 | groES    | GroES protein                                          |
| PA4420   | 2.3  | 0.0000 | PA4420   | Hypothetical, unclassified, unknown                    |
| PA4421   | 2.7  | 0.0000 | PA4421   | Hypothetical, unclassified, unknown                    |
| PA4520   | 2.4  | 0.0000 | PA4520   | Adaptation, Protection; Chemotaxis                     |
| PA4542   | 2.0  | 0.0000 | clpB     | ClpB protein                                           |
| PA4565   | 2.0  | 0.0000 | proB     | glutamate 5-kinase                                     |
| PA4566   | 2.5  | 0.0000 | obg      | GTP-binding protein Obg                                |
| PA4567   | 2.4  | 0.0000 | rpmA     | 50S ribosomal protein L27                              |
| PA4568   | 2.2  | 0.0000 | rplU     | 50S ribosomal protein L21                              |
| PA4582   | 2.1  | 0.0000 | PA4582   | Hypothetical, unclassified, unknown                    |
| PA4583   | 2.3  | 0.0000 | PA4583   | Hypothetical, unclassified, unknown                    |
| PA4629   | 2.5  | 0.0055 | PA4629   | Hypothetical, unclassified, unknown                    |
| PA4635   | 4.0  | 0.0000 | PA4635   | Hypothetical, unclassified, unknown                    |
| PA4746   | 2.0  | 0.0000 | PA4746   | Hypothetical, unclassified, unknown                    |
| PA4761   | 2.9  | 0.0000 | dnaK     | DnaK protein                                           |
| PA4762   | 2.7  | 0.0000 | grpE     | heat shock protein GrpE                                |
| PA4763   | 17.1 | 0.0000 | recN     | DNA repair protein RecN                                |
| PA4825   | 3.3  | 0.0000 | mgtA     | "Mg(2+) transport ATPase, P-type 2"                    |
| PA4826   | 5.3  | 0.0000 | PA4826   | Hypothetical, unclassified, unknown                    |
| PA4834   | 4.1  | 0.0000 | PA4834   | Membrane proteins                                      |
| PA4835   | 20.5 | 0.0000 | PA4835   | Hypothetical, unclassified, unknown; Membrane proteins |
| PA4836   | 57.5 | 0.0000 | PA4836   | Hypothetical, unclassified, unknown                    |
| PA4837   | 72.6 | 0.0000 | PA4837   | Membrane proteins; Transport of small molecules        |
| PA4838   | 7.8  | 0.0000 | PA4838   | Hypothetical, unclassified, unknown                    |
| PA4888   | 3.1  | 0.0001 | desB     | Fatty acid and phospholipid metabolism                 |
| PA4889   | 2.9  | 0.0075 | PA4889   | Putative enzymes                                       |
| PA4890   | 2.3  | 0.0007 | desT     | Transcriptional regulators                             |
| PA4892   | 2.3  | 0.0039 | ureF     | urease accessory protein UreF                          |
| PA4893   | 3.0  | 0.0000 | ureG     | urease accessory protein UreG                          |
| PA4918   | 2.9  | 0.0000 | PA4918   | Hypothetical, unclassified, unknown                    |
| PA4932   | 3.0  | 0.0000 | rplI     | 50S ribosomal protein L9                               |
| PA4933   | 3.2  | 0.0000 | PA4933   | Membrane proteins                                      |
| PA4934   | 3.8  | 0.0000 | rpsR     | 30S ribosomal protein S18                              |
| PA4935   | 3.5  | 0.0000 | rpsF     | 30S ribosomal protein S6                               |
| PA5049   | 2.4  | 0.0000 | rpmE     | 50S ribosomal protein L31                              |
| PA5053   | 2.6  | 0.0000 | hslV     | heat shock protein HslV                                |
| PA5054   | 2.2  | 0.0000 | hslU     | heat shock protein HslU                                |
| PA5072   | 4.2  | 0.0000 | PA5072   | Adaptation, Protection; Chemotaxis                     |
| PA5082   | 2.5  | 0.0000 | PA5082   | Transport of small molecules                           |

|        |      |        |        |                                                           |
|--------|------|--------|--------|-----------------------------------------------------------|
| PA5084 | 2.1  | 0.0329 | PA5084 | Putative enzymes                                          |
| PA5098 | 5.4  | 0.0412 | hutH   | histidine ammonia-lyase                                   |
| PA5106 | 7.0  | 0.0129 | PA5106 | Hypothetical, unclassified, unknown                       |
| PA5217 | 2.2  | 0.0000 | PA5217 | Transport of small molecules                              |
| PA5315 | 2.8  | 0.0000 | rpmG   | 50S ribosomal protein L33                                 |
| PA5316 | 3.9  | 0.0000 | rpmB   | 50S ribosomal protein L28                                 |
| PA5401 | 3.7  | 0.0135 | PA5401 | Hypothetical, unclassified, unknown                       |
| PA5464 | 2.6  | 0.0000 | PA5464 | Hypothetical, unclassified, unknown                       |
| PA5466 | 2.9  | 0.0000 | PA5466 | Membrane proteins                                         |
| PA5468 | 3.8  | 0.0000 | PA5468 | Transport of small molecules                              |
| PA5469 | 7.2  | 0.0000 | PA5469 | Membrane proteins                                         |
| PA5470 | 5.5  | 0.0000 | PA5470 | Translation, post-translational modification, degradation |
| PA5471 | 5.5  | 0.0000 | PA5471 | Antibiotic resistance and susceptibility                  |
| PA5498 | 2.3  | 0.0000 | PA5498 | Motility & Attachment                                     |
| PA5499 | 2.2  | 0.0000 | np20   | transcriptional regulator np20                            |
| PA5529 | 2.5  | 0.0000 | PA5529 | Membrane proteins; Transport of small molecules           |
| PA5530 | 5.2  | 0.0000 | PA5530 | Membrane proteins; Transport of small molecules           |
| PA5534 | 12.5 | 0.0000 | PA5534 | Hypothetical, unclassified, unknown                       |
| PA5535 | 14.2 | 0.0000 | PA5535 | Hypothetical, unclassified, unknown                       |
| PA5536 | 58.1 | 0.0000 | PA5536 | Transcriptional regulators; Adaptation, Protection        |
| PA5537 | 3.4  | 0.0000 | PA5537 | Hypothetical, unclassified, unknown                       |
| PA5538 | 21.8 | 0.0000 | amiA   | N-acetylmuramoyl-L-alanine amidase                        |
| PA5539 | 16.4 | 0.0000 | PA5539 | Hypothetical, unclassified, unknown                       |
| PA5540 | 11.7 | 0.0000 | PA5540 | Hypothetical, unclassified, unknown                       |
| PA5541 | 5.4  | 0.0000 | pyrQ   | dihydroorotase                                            |

**Table S2: Genes reduced at least 2 folds in PAO1 by cisplatin treatment.**

| <b>Locus_Tag</b> | <b>fold change</b> | <b>P-Value</b> | <b>Gene name</b> | <b>Annotation</b>                                                                |
|------------------|--------------------|----------------|------------------|----------------------------------------------------------------------------------|
| PA0028           | -2.4               | 0.0000         | PA0028           | Hypothetical, unclassified, unknown                                              |
| PA0044           | -2.3               | 0.0000         | exoT             | Secreted Factors (toxins, enzymes, alginate)                                     |
| PA0391           | -2.0               | 0.0000         | PA0391           | Hypothetical, unclassified, unknown                                              |
| PA0744           | -2.6               | 0.0000         | PA0744           | Putative enzymes                                                                 |
| PA0745           | -2.3               | 0.0000         | PA0745           | Putative enzymes                                                                 |
| PA0746           | -2.1               | 0.0000         | PA0746           | Putative enzymes                                                                 |
| PA0747           | -2.1               | 0.0000         | PA0747           | Putative enzymes                                                                 |
| PA1245           | -2.2               | 0.0000         | PA1245           | Membrane proteins; Secreted Factors (toxins, enzymes, alginate)                  |
| PA1246           | -2.4               | 0.0000         | aprD             | alkaline protease secretion protein AprD                                         |
| PA1247           | -2.4               | 0.0000         | aprE             | alkaline protease secretion protein AprE                                         |
| PA1248           | -2.4               | 0.0000         | aprF             | Alkaline protease secretion outer membrane protein AprF precursor                |
| PA1249           | -2.3               | 0.0000         | aprA             | Secreted Factors (toxins, enzymes, alginate)                                     |
| PA1317           | -2.9               | 0.0000         | cyoA             | cytochrome o ubiquinol oxidase subunit II                                        |
| PA1318           | -2.9               | 0.0000         | cyoB             | cytochrome o ubiquinol oxidase subunit I                                         |
| PA1319           | -2.9               | 0.0000         | cyoC             | cytochrome o ubiquinol oxidase subunit III                                       |
| PA1320           | -2.7               | 0.0000         | cyoD             | cytochrome o ubiquinol oxidase subunit IV                                        |
| PA1321           | -2.8               | 0.0000         | cyoE             | cytochrome o ubiquinol oxidase protein CyoE                                      |
| PA1698           | -2.5               | 0.0000         | popN             | Type III secretion outer membrane protein PopN precursor                         |
| PA1699           | -2.6               | 0.0200         | PA1699           | Protein secretion/export apparatus; Secreted Factors (toxins, enzymes, alginate) |
| PA1705           | -3.0               | 0.0003         | pcrG             | regulator in type III secretion                                                  |
| PA1706           | -3.0               | 0.0000         | pcrV             | type III secretion protein PcrV                                                  |
| PA1707           | -3.7               | 0.0000         | pcrH             | regulatory protein PcrH                                                          |
| PA1708           | -4.3               | 0.0000         | popB             | translocator protein PopB                                                        |
| PA1709           | -4.4               | 0.0000         | popD             | Translocator outer membrane protein PopD precursor                               |
| PA1710           | -2.6               | 0.0000         | exsC             | "ExsC, exoenzyme S synthesis protein C precursor."                               |
| PA1711           | -2.6               | 0.0000         | exsE             | ExsE                                                                             |
| PA1712           | -2.7               | 0.0000         | exsB             | exoenzyme S synthesis protein B                                                  |
| PA1718           | -2.5               | 0.0279         | pscE             | type III export protein PscE                                                     |
| PA1720           | -2.2               | 0.0139         | pscG             | type III export protein PscF                                                     |
| PA1899           | -2.2               | 0.0026         | phzA2            | Secreted Factors (toxins, enzymes, alginate)                                     |
| PA1900           | -2.1               | 0.0089         | phzB2            | Secreted Factors (toxins, enzymes, alginate)                                     |
| PA1901           | -3.0               | 0.0004         | phzC2            | Secreted Factors (toxins, enzymes, alginate)                                     |
| PA1906           | -2.0               | 0.0000         | PA1906           | Hypothetical, unclassified, unknown                                              |
| PA2026           | -2.8               | 0.0000         | PA2026           | Membrane proteins                                                                |
| PA2027           | -90.0              | 0.0000         | PA2027           | Hypothetical, unclassified, unknown                                              |
| PA2062           | -2.6               | 0.0000         | PA2062           | Putative enzymes                                                                 |
| PA2083           | -2.1               | 0.0000         | PA2083           | Carbon compound catabolism                                                       |
| PA2191           | -2.6               | 0.0000         | exoY             | Secreted Factors (toxins, enzymes, alginate)                                     |
| PA2368           | -2.1               | 0.0017         | PA2368           | Hypothetical, unclassified, unknown                                              |
| PA2786           | -2.4               | 0.0000         | PA2786           | Hypothetical, unclassified, unknown                                              |
| PA3117           | -4.6               | 0.0000         | asd              | aspartate semialdehyde dehydrogenase                                             |

|        |       |        |        |                                                                                                                    |
|--------|-------|--------|--------|--------------------------------------------------------------------------------------------------------------------|
| PA3118 | -8.8  | 0.0000 | leuB   | 3-isopropylmalate dehydrogenase                                                                                    |
| PA3119 | -47.6 | 0.0000 | PA3119 | Hypothetical, unclassified, unknown                                                                                |
| PA3120 | -40.2 | 0.0000 | leuD   | 3-isopropylmalate dehydratase small subunit                                                                        |
| PA3121 | -51.8 | 0.0000 | leuC   | 3-isopropylmalate dehydratase large subunit                                                                        |
| PA3278 | -3.0  | 0.0000 | PA3278 | Membrane proteins                                                                                                  |
| PA3568 | -3.1  | 0.0000 | PA3568 | Putative enzymes                                                                                                   |
| PA3569 | -3.5  | 0.0000 | mmsB   | 3-hydroxyisobutyrate dehydrogenase                                                                                 |
| PA3570 | -3.1  | 0.0000 | mmsA   | methylmalonate-semialdehyde dehydrogenase                                                                          |
| PA3710 | -2.7  | 0.0000 | PA3710 | Carbon compound catabolism                                                                                         |
| PA3792 | -24.0 | 0.0000 | leuA   | 2-isopropylmalate synthase                                                                                         |
| PA3841 | -2.4  | 0.0000 | exoS   | Secreted Factors (toxins, enzymes, alginate)                                                                       |
| PA3842 | -3.3  | 0.0000 | PA3842 | Secreted Factors (toxins, enzymes, alginate); Chaperones & heat shock proteins; Protein secretion/export apparatus |
| PA3964 | -8.9  | 0.0000 | PA3964 | Hypothetical, unclassified, unknown                                                                                |
| PA3965 | -10.4 | 0.0000 | PA3965 | Transcriptional regulators                                                                                         |
| PA4175 | -2.1  | 0.0000 | piv    | Secreted Factors (toxins, enzymes, alginate)                                                                       |
| PA4219 | -2.1  | 0.0004 | PA4219 | Membrane proteins; Antibiotic resistance and susceptibility                                                        |
| PA4222 | -2.4  | 0.0000 | PA4222 | Transport of small molecules                                                                                       |
| PA4223 | -2.4  | 0.0000 | PA4223 | Membrane proteins; Transport of small molecules                                                                    |
| PA4224 | -2.3  | 0.0000 | pchG   | pyochelin biosynthetic protein PchG                                                                                |
| PA4225 | -2.2  | 0.0000 | pchF   | pyochelin synthetase                                                                                               |
| PA4226 | -2.1  | 0.0000 | pchE   | dihydroaeruginic acid synthetase                                                                                   |
| PA4229 | -2.0  | 0.0000 | pchC   | pyochelin biosynthetic protein PchC                                                                                |
| PA4694 | -3.0  | 0.0000 | ilvC   | ketol-acid reductoisomerase                                                                                        |
| PA4695 | -4.0  | 0.0000 | ilvH   | acetolactate synthase isozyme III small subunit                                                                    |
| PA4696 | -4.5  | 0.0000 | ilvI   | acetolactate synthase large subunit                                                                                |
| PA5302 | -2.5  | 0.0000 | dadX   | catabolic alanine racemase                                                                                         |
| PA5303 | -2.6  | 0.0000 | PA5303 | Hypothetical, unclassified, unknown                                                                                |
| PA5304 | -2.5  | 0.0000 | dadA   | "D-amino acid dehydrogenase, small subunit"                                                                        |
| PA5548 | -2.8  | 0.0000 | PA5548 | Membrane proteins; Transport of small molecules                                                                    |
| PA5549 | -13.8 | 0.0000 | glmS   | glucosamine--fructose-6-phosphate aminotransferase                                                                 |
| PA5550 | -8.7  | 0.0000 | glmR   | GlmR transcriptional regulator                                                                                     |

**Table S3: Bacterial strains used in this study.**

| Strain                         | Relevant characteristics                                                                              | Source or reference |
|--------------------------------|-------------------------------------------------------------------------------------------------------|---------------------|
| <b><i>P. aeruginosa</i></b>    |                                                                                                       |                     |
| PAO1                           | Prototypic non-mucoid wild-type strain                                                                | [1]                 |
| PAO1/ $\Delta$ <i>recA</i>     | <i>recA</i> knockout of PAO1 constructed by allelic exchange                                          | [2]                 |
| PAO1/ $\Delta$ <i>recA</i> COM | <i>recA</i> knockout of PAO1 constructed by allelic exchange with <i>recA</i> complementation plasmid | [2]                 |
| PA14                           | Non-mucoid wild-type strain                                                                           | [3]                 |
| CF clinical isolate 57388A     | mucoid multiple-drug resistant (MDR) clinical isolate                                                 | [4]                 |

**Table S4: Primers used for the qRT-PCR analysis.**

| Reference gene |                      | Target gene |                           |
|----------------|----------------------|-------------|---------------------------|
| GAPDH_F        | GACCGTTCCTCGACAAGTTC | exoS_F      | GACGACGGCTATCTCTCC<br>AC  |
| GAPDH_R        | TCAGCAGGCCTTCGAGATAG | exoS_R      | GTTTCGATATCCCGCTGACA<br>T |
| gyrB_F         | CACGTACGACTCTTCCAGCA | pscG_F      | AGCACTGCCACGAAGAG<br>G    |
| gyrB_R         | GAACACCATGTGGTGCAGAC | pscG_R      | AGGCCAGGGCTTCCTGAT<br>AG  |
| rpoD_F         | GGGGCTGTCTCGAATACGTT | pscL_F      | CGAGGTTTACCAGGAGCA<br>GA  |
| rpoD_R         | GGGATACCTGACTTACGCGG | pscL_R      | GTAGCGTTTCCTGGATCA<br>GC  |

**References:**

1. Holloway, B.W. and A.F. Morgan, *Genome organization in Pseudomonas*. Annu Rev Microbiol, 1986. **40**: p. 79-105.
2. Miller, R.V. and T.A. Kokjohn, *Expression of the recA gene of Pseudomonas aeruginosa PAO is inducible by DNA-damaging agents*. J Bacteriol, 1988. **170**(5): p. 2385-7.
3. O'Toole, G.A. and R. Kolter, *Flagellar and twitching motility are necessary for Pseudomonas aeruginosa biofilm development*. Mol Microbiol, 1998. **30**(2): p. 295-304.
4. Hoffmann, N., et al., *Novel mouse model of chronic Pseudomonas aeruginosa lung infection mimicking cystic fibrosis*. Infect Immun, 2005. **73**(4): p. 2504-14.
